# Supplementary material for: Functional apoptosis profiling identifies MCL-1 and BCL-xL as prognostic markers and therapeutic targets in advanced thymomas and thymic carcinomas
Source: Springer Nature journal article supplement (doi:10.1186/s12916-021-02158-3), 2021-11-16
Supplement: MOESM1 [file 19871510]

**Figure S1**

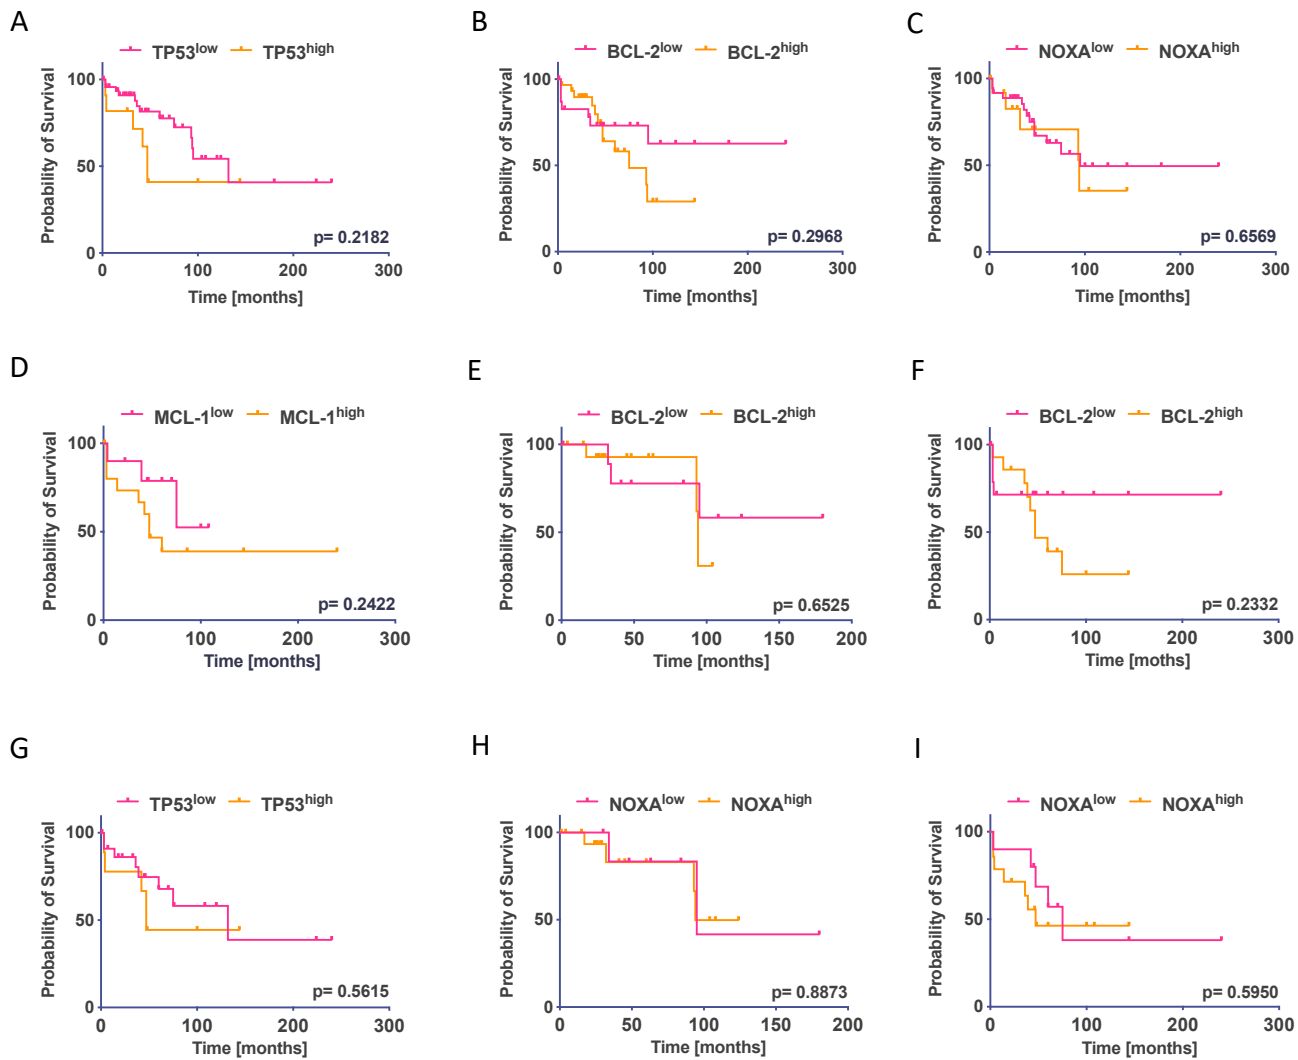

**Figure S2**

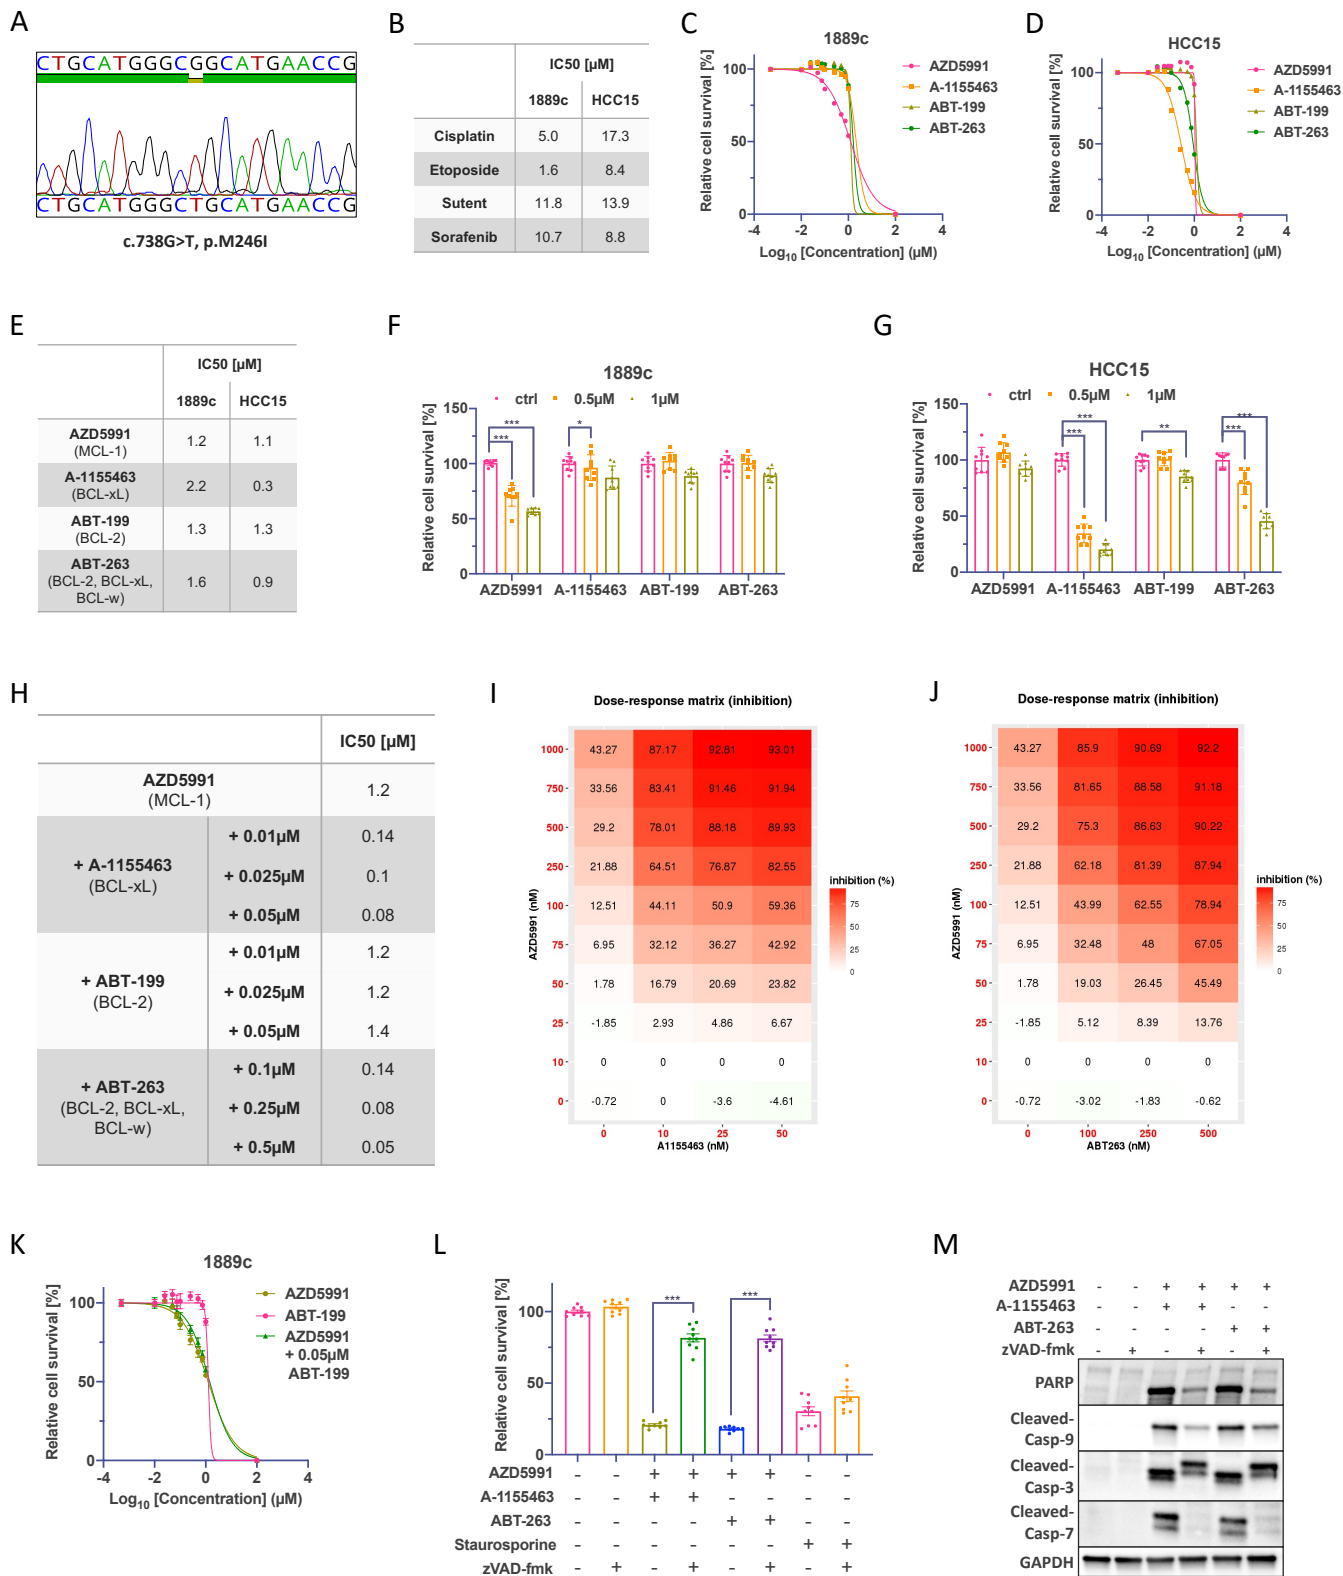

**Figure S3**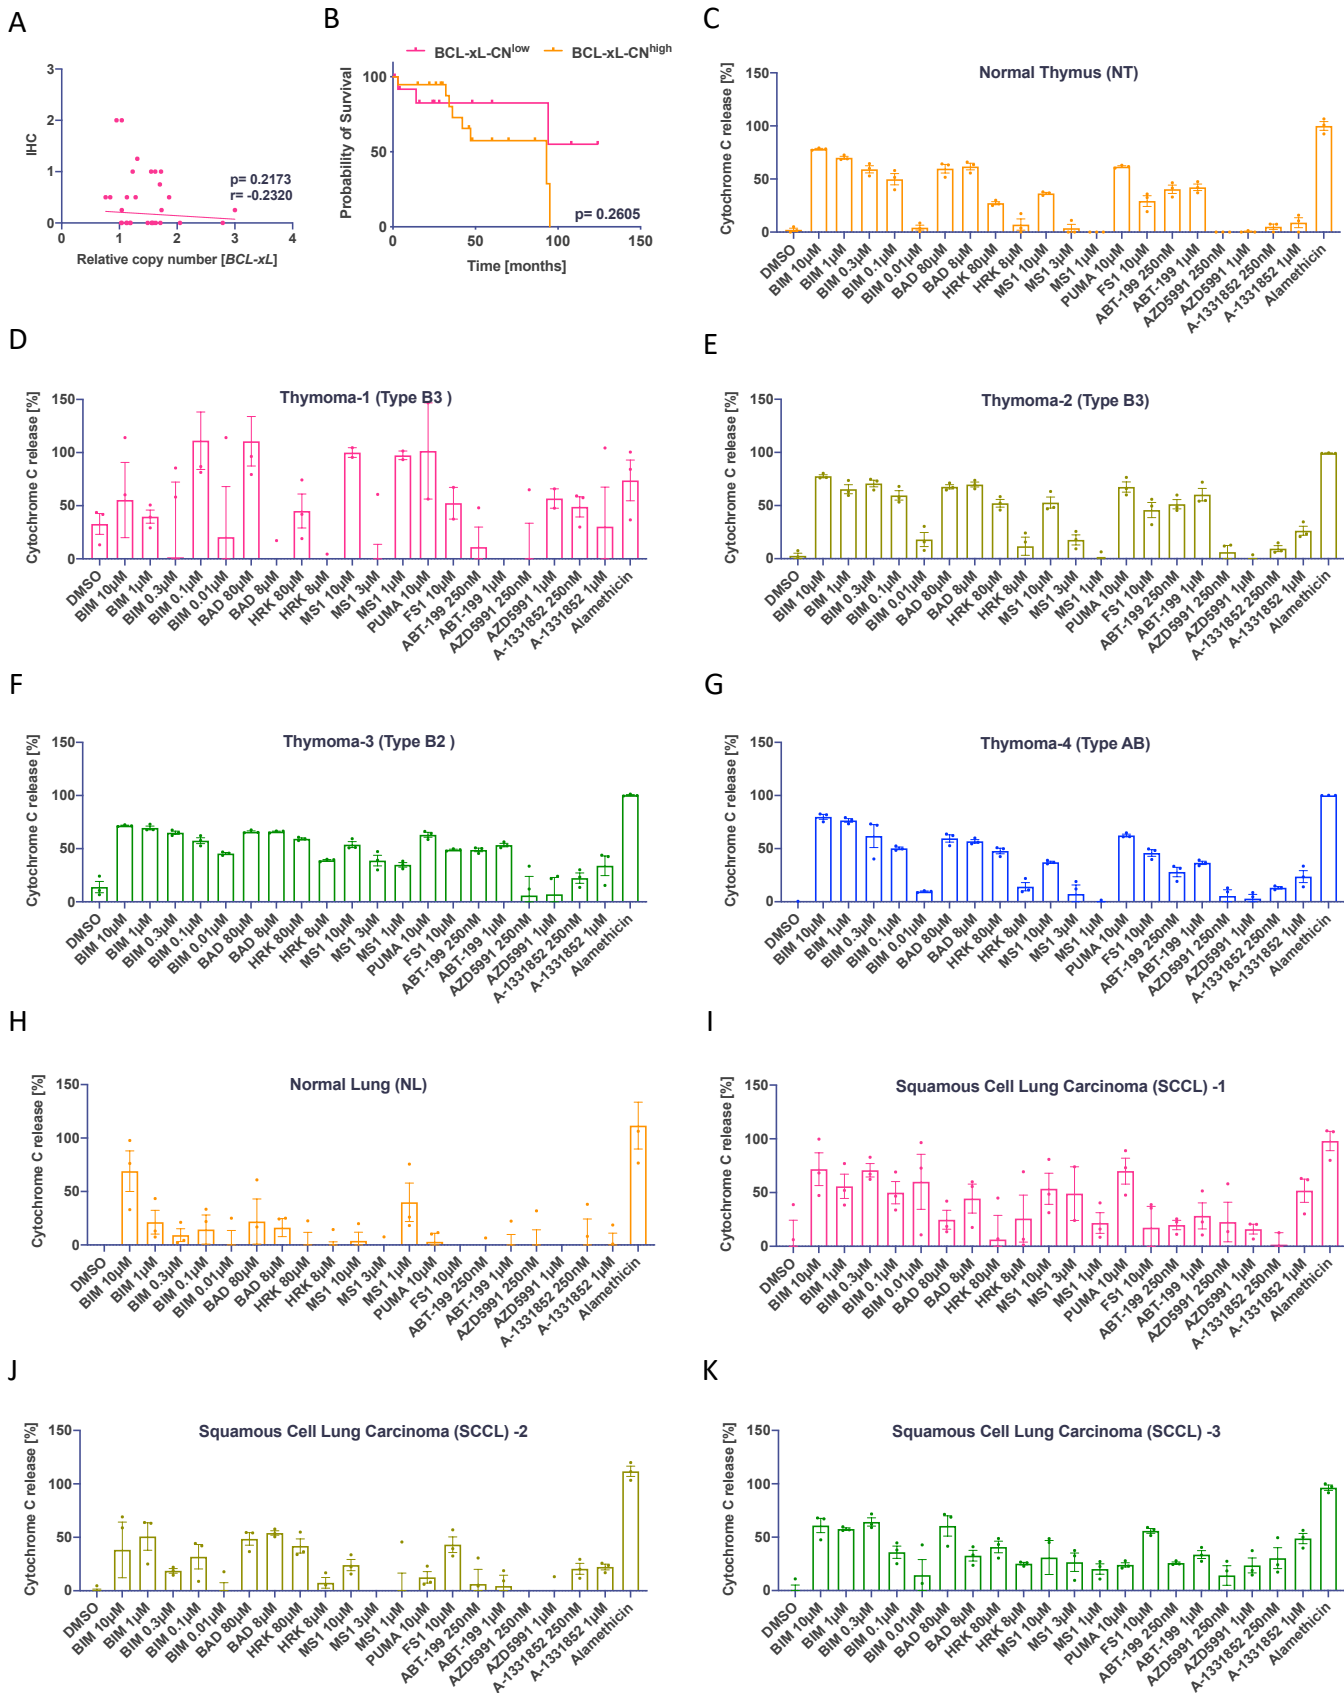

**Table S1: Clinicopathological parameters of primary patient tissue samples.**

| Tissue                                   | Masaoka-Koga | pT   | N  | L  | V  | R  | Grading |
|------------------------------------------|--------------|------|----|----|----|----|---------|
| Normal Thymus (NT)                       | -            | -    | -  | -  | -  | -  | -       |
| Type B3 Thymoma (TH-1)                   | II           | pT1a | N0 | -  | -  | R0 | -       |
| Type B3 Thymoma (TH-2)                   | IIa          | pT1a | N0 | L0 | V0 | R0 | -       |
| Type B2 Thymoma (TH-3)                   | IIa          | pT1a | N1 | L0 | V0 | R0 | -       |
| Type AB Thymoma (TH-4)                   | I            | pT1a | -  | L0 | V0 | R0 | -       |
| Normal Lung (NL)                         | -            | -    | -  | -  | -  | -  | -       |
| Squamous Cell Lung<br>Carcinoma (SCCL-1) | -            | pT4  | N1 | -  | -  | R0 | G2      |
| Squamous Cell Lung<br>Carcinoma (SCCL-2) | -            | pT2b | N0 | L0 | V0 | R0 | G3      |
| Squamous Cell Lung<br>Carcinoma (SCCL-3) | -            | pT3  | N0 | -  | V1 | R0 | G3      |

**Table S2: Antibodies and chemical compounds.**

| Antibodies                    | Cat.No. | Western Blot Dilution | IHC Dilution        |
|-------------------------------|---------|-----------------------|---------------------|
| Primary – Cell Signaling      |         |                       |                     |
| BAK                           | #12105  | 1:1000                | x                   |
| BAX                           | #2774   | 1:1000                | x                   |
| BCL-2                         | #2872   | 1:1000                | Ready to use (Dako) |
| BCL-xL                        | #2764   | 1:1000                | 1:2000              |
| BIM                           | #2933   | 1:1000                | x                   |
| Caspase-3                     | #9662   | 1:1000                | x                   |
| Caspase-7                     | #9492   | 1:1000                | x                   |
| Caspase-9                     | #9508   | 1:1000                | x                   |
| Cleaved Caspase-3             | #9664   | 1:1000                | x                   |
| Cleaved Caspase-7             | #8438   | 1:1000                | x                   |
| Cleaved Caspase-9             | #7237   | 1:1000                | x                   |
| Cleaved PARP                  | #5625   | 1:1000                | x                   |
| GAPDH                         | #2118   | 1:5000                | x                   |
| MCL-1                         | #4572   | 1:1000                | 1:200               |
| NOXA                          | #14766  | 1:1000                | 1:200               |
| PARP                          | #9542   | 1:1000                | x                   |
| Primary – Santa cruz          |         |                       |                     |
| TP53                          | sc-126  | 1:1000                | Ready to use (Dako) |
| Secondary (all Sigma-Aldrich) |         |                       |                     |
| Polyclonal Goat anti-rabbit   | P0260   | 1:10000               | x                   |
| Polyclonal Rabbit anti-mouse  | P0448   | 1:10000               | x                   |
| Compounds (all Selleckchem)   |         |                       |                     |
| A-1155463                     | #S7800  |                       |                     |
| ABT-199 (Venetoclax)          | #S8048  |                       |                     |
| ABT-263 (Navitoclax)          | #S1001  |                       |                     |
| AZD-5991                      | #S8643  |                       |                     |
| Cisplatin                     | #S1166  |                       |                     |
| Etoposide                     | #S1225  |                       |                     |
| Sorafenib                     | #S7397  |                       |                     |
| Sunitinib                     | #S1042  |                       |                     |
| zVAD.fmk                      | #S7023  |                       |                     |

**Table S3: Primer sequences, plasmids and siRNAs.**

| Primer      | Sequence                        |
|-------------|---------------------------------|
| 3p2-for     | 5'-CACAGAGTAAAGGCCCGTGACTTT-3'  |
| 3p2-rev     | 5'-ACAGAAGGGCCAGAAAGAACCGAAC-3' |
| BCL-xL-for1 | 5'-TGTGCTTCAGAGATCAGGCA-3'      |
| BCL-xL-rev1 | 5'-GGTCTGTGGGTCATTGATGC-3'      |
| BCL-xL-for2 | 5'-GTTACCCTCTCTCCTCTGCC-3'      |
| BCL-xL-rev2 | 5'-GAGGGAGGGATAAGGAAGCC-3'      |
| MCL-1-for1  | 5'-GTCCCCAACTATGCCCTCTT-3'      |
| MCL-1-rev1  | 5'-GTGCTTCCCTGAGACCTGAT-3'      |
| MCL-1-for2  | 5'-AGTGGTATGGCGGTCTTGAA-3'      |
| MCL-1-rev2  | 5'-TCCATTA AACAGGCACCGC-3'      |

---

| Plasmids (all OriGene Technologies)                 | Cat.No.  |
|-----------------------------------------------------|----------|
| NOXA (PMAIP1) (NM_021127)<br>Human Tagged ORF clone | RC202071 |
| pCMV6-Entry Mammalian<br>Expression Vectors         | PS100001 |

---

| siRNAs (all Qiagen) | Cat.No.     |
|---------------------|-------------|
| Hs_BCL2L1_2         | #SI00023191 |
| Hs_BCL2L1_10        | #SI03112018 |
| Hs_MCL1_6           | #SI02781205 |
| Hs_MCL1_8           | #SI03069003 |
| Neg. ctrl. siRNA    | #1027281    |
